# Supplementary material
Source: MDPI journal article supplement (https://www.mdpi.com/2673-9623/1/2/9)
Supplement: s1 [file s1]

# Supplementary Materials: Group Contribution Revisited: The Enthalpy of Formation of Organic Compounds with “Chemical Accuracy” Part II

Robert J. Meier

**Table S1.** Experimental and model values for mono-methylalkanes, where for the model values for the 2-methylalkanes a correction of  $-2.1$  kJ/mol has been added to account for the geminal effect (see text). All values in kJ/mol. When available, Rossini c.s. data [18] were used when comparing with the present model (model – exp), otherwise NIST data, and when both were not available CAPEC data [12]. The red value 1.08 kJ/mol in the last row is the averaged absolute difference between the model Equation (4) and the experimental values. It may be recalled that the  $\text{CH}_2$  increment for 2-methylnonane ( $-22.35$  kJ/mol) is an indicator for an error in the experimental value ( $-260.2$  kJ/mol) [1] which might explain the larger deviation though still within chemical accuracy.

| Monomethyl alkanes           | Rossini | NIST   | NIST incr. | model dH | model-exp + correction<br>( $-2.1$ ) | ABS<br>(model-exp) |
|------------------------------|---------|--------|------------|----------|--------------------------------------|--------------------|
| 2-methylpropane              | -131.7  | -134.9 |            | -131.08  | -1.48                                | 1.48               |
| 2-methylbutane               | -154.6  | -154.1 | -19.20     | -151.71  | 0.79                                 | 0.79               |
| 2-methylpentane              | -174.43 | -174.3 | -20.20     | -172.34  | -0.01                                | 0.01               |
| 2-methylhexane               | -195.1  | -195.5 | -21.20     | -192.97  | 0.03                                 | 0.03               |
| 2-methylheptane              | -215.63 | -215.5 | -20.00     | -213.6   | -0.07                                | 0.07               |
| 2-methyloctane               |         |        |            | -234.23  | -0.43                                | 0.43               |
| 2-methylnonane               |         | -260.2 | -22.35     | -254.86  | 3.24                                 | 3.24               |
| 3-methylpentane              | -171.8  | -171.6 |            | -172.34  | -0.54                                | 0.54               |
| 3-methylhexane               | -192.4  | -192.5 | -20.90     | -192.97  | -0.57                                | 0.57               |
| 3-methylheptane              | -212.78 | -212.6 | -20.10     | -213.6   | -0.82                                | 0.82               |
| 4-methylheptane              | -212.24 | -212.1 |            | -213.6   | -1.36                                | 1.36               |
| 4-methyloctane               |         |        |            | -234.23  | 0.97                                 | 0.97               |
| 5-methylnonane               |         | -258.6 | -23.25     | -254.86  | 3.74                                 | 3.74               |
| averaged absolute difference |         |        |            |          |                                      | 1.08               |

**Table S2.** Experimental and model values for dimethylalkanes. All values in kJ/mol. When available, Rossini c.s. data [18] available CAPEC data (not shown). The red value 1.08 kJ/mol in the last row is the averaged absolute difference between the final model (for discussion see text) and the experimental values.

| Dimethyl alkanes             | Rossini | NIST   | model dHf | model-exp | ABS<br>(model-exp) | model-exp +<br>correction | ABS (model-<br>exp+corr.) |
|------------------------------|---------|--------|-----------|-----------|--------------------|---------------------------|---------------------------|
| 2,2-dimethylpropane          | -166.10 | -168   | -170.44   | -4.34     | 4.34               | -1.74                     | 1.74                      |
| 2,2-dimethylbutane           | -185.70 | -185.6 | -191.07   | -5.37     | 5.37               | 1.43                      | 1.43                      |
| 2,2-dimethylpentane          | -206.38 | -208   | -211.7    | -5.32     | 5.32               | 1.48                      | 1.48                      |
| 2,2-dimethylhexane           | -224.88 | -224.7 | -232.33   | -7.45     | 7.45               | -0.65                     | 0.65                      |
| 2,2-dimethylheptane          |         | -246.1 | -252.96   | -6.86     | 6.86               | -0.06                     | 0.06                      |
| 2,3-dimethylbutane           | -177.90 | -177.8 | -177.44   | 0.46      | 0.46               | 0.06                      | 0.06                      |
| 2,3-dimethylpentane          | -199.40 | -199   | -198.07   | 1.33      | 1.33               | 3.03                      | 3.03                      |
| 2,3-dimethylhexane           | -214.10 | -213.9 | -218.7    | -4.60     | 4.6                | -2.90                     | 2.9                       |
| 3,4-dimethylhexane           | -213.16 | -213   | -218.7    | -5.54     | 5.54               | -1.74                     | 1.74                      |
| 2,4-dimethylpentane          | -202.20 | -203.5 | -198.07   | 4.13      | 4.13               | -0.07                     | 0.07                      |
| 2,4-dimethylhexane           | -219.60 | -219.4 | -218.7    | 0.90      | 0.9                | -1.20                     | 1.2                       |
| 2,5-dimethylhexane           | -222.80 | -222.6 | -218.7    | 4.10      | 4.1                | -0.10                     | 0.1                       |
| 2,6-dimethylheptane          |         |        | -239.33   | 3.47      | 3.47               | -0.73                     | 0.73                      |
| 2,6-dimethyloctane           |         |        | -259.96   | 1.14      | 1.14               | -0.96                     | 0.96                      |
| 2,7-dimethyloctane           |         |        | -259.96   | 4.04      | 4.04               | -0.16                     | 0.16                      |
| 3,3-dimethylpentane          | -201.70 | -204   | -211.7    | -10.00    | 10                 | 1.00                      | 1                         |
| 3,3-dimethylhexane           | -220.28 | -220.1 | -232.33   | -12.05    | 12.05              | -1.05                     | 1.05                      |
| averaged absolute difference |         |        |           |           | 4.77               |                           | 1.08                      |

**Table S3.** Experimental and model values for trimethylalkanes. All values in kJ/mol. Experimental data from Rossini c.s. [19] were used to compare with the present model (model – exp). The red value 1.18 kJ/mol in the last row is the averaged absolute difference between the final model (for discussion see text) and the experimental values.

| Trimethyl alkanes            | Rossini | model dHf | model-exp | ABS<br>(model-exp) | model-exp +<br>correction | ABS (model-exp<br>+ correction) | ABS (model-exp +<br>correction + Me-Me-<br>1,5-interaction ) |
|------------------------------|---------|-----------|-----------|--------------------|---------------------------|---------------------------------|--------------------------------------------------------------|
| 2,2,3-trimethylbutane        | -205.00 | -216.8    | -11.80    | 11.8               | -1.30                     | 1.3                             | 1.30                                                         |
| 2,2,3-trimethylpentane       | -220.30 | -237.43   | -17.13    | 17.13              | -2.73                     | 2.73                            | 2.73                                                         |
| 2,2,4-trimethylpentane       | -224.30 | -237.43   | -13.13    | 13.13              | -8.43                     | 8.43                            | 0.07                                                         |
| 2,3,3-trimethylpentane       | -216.60 | -237.43   | -20.83    | 20.83              | -4.33                     | 4.33                            | 4.33                                                         |
| 2,3,4-trimethylpentane       | -217.60 | -223.8    | -6.20     | 6.2                | -2.80                     | 2.8                             | 2.80                                                         |
| 2,2,5-trimethylhexane        | -254.19 | -258.06   | -3.87     | 3.87               | 0.83                      | 0.83                            | 0.83                                                         |
| 2,4,4-trimethylhexane        | -241.00 | -258.06   | -17.06    | 17.06              | -8.16                     | 8.16                            | 0.34                                                         |
| 2,3,3-trimethylhexane        | -238.99 | -258.06   | -19.07    | 19.07              | -2.57                     | 2.57                            | 2.57                                                         |
| 2,2,3-trimethylhexane        | -241.38 | -258.06   | -16.68    | 16.68              | -2.28                     | 2.28                            | 2.28                                                         |
| 2,2,4-trimethylhexane        | -243.39 | -258.06   | -14.67    | 14.67              | -7.87                     | 7.87                            | 0.63                                                         |
| 2,3,4-trimethylhexane        | -235.23 | -244.43   | -9.20     | 9.2                | -3.70                     | 3.7                             | 3.70                                                         |
| 2,3,5-trimethylhexane        | -242.97 | -244.43   | -1.46     | 1.46               | -1.86                     | 1.86                            | 1.86                                                         |
| 3,3,4-trimethylhexane        | -236.10 | -258.06   | -21.96    | 21.96              | -3.36                     | 3.36                            | 3.36                                                         |
| averaged absolute difference |         |           |           | 13.31              |                           | 3.86                            | 2.06                                                         |

**Table S4.** Experimental and model values for tetramethylalkanes. All values in kJ/mol. Rossini c.s. data [19] except for 2,2,5,5-tetramethylhexane (CAPEC data base) were used when comparing with the present model (model – exp). The red value 3.27 kJ/mol in the last row is the averaged absolute difference between the final model (for discussion see text) and the experimental values.

| Tetramethyl alkanes          | Rossini | model dHf | model-exp | ABS<br>(model-exp) | model-exp +<br>correction | ABS(model-exp+<br>correction) | ABS (model-exp +<br>correction + Me-Me-<br>1,5-interaction ) |
|------------------------------|---------|-----------|-----------|--------------------|---------------------------|-------------------------------|--------------------------------------------------------------|
| 2,2,3,3-tetramethylbutane    | -226.06 | -256.16   | -30.10    | 30.1               | -1.30                     | 1.3                           | 1.30                                                         |
| 2,2,3,4-tetramethylpentane   | -237.15 | -263.16   | -26.01    | 26.01              | -9.91                     | 9.91                          | 1.41                                                         |
| 2,2,3,3-tetramethylpentane   | -237.40 | -276.79   | -39.39    | 39.39              | -6.39                     | 6.39                          | 6.39                                                         |
| 2,2,4,4-tetramethylpentane   | -242.13 | -276.79   | -34.66    | 34.66              | -21.06                    | 21.06                         | 4.06                                                         |
| 2,3,3,4-tetramethylpentane   | -236.40 | -263.16   | -26.76    | 26.76              | -4.76                     | 4.76                          | 4.76                                                         |
| 2,2,5,5-tetramethylhexane    |         | -297.42   | -11.92    | 11.92              | 1.68                      | 1.68                          | 1.68                                                         |
| averaged absolute difference |         |           |           | 28.14              |                           | 7.52                          | 3.27                                                         |

**Table S5.** Experimental and model values for pentamethylalkanes. All values in kJ/mol. When available, Experimental data from Rossini c.s. [19] were used when comparing with the present model (model – exp). Corrections as described in the text.

| Pentamethyl alkanes          | Rossini | model dHf | model-exp | ABS<br>(model-exp) | model-exp +<br>correction | ABS(model-exp<br>+ correction) | ABS (model-exp +<br>correction + Me-Me-<br>1,5-interaction) |
|------------------------------|---------|-----------|-----------|--------------------|---------------------------|--------------------------------|-------------------------------------------------------------|
| 2,2,3,3,4-pentamethylpentane | -247.4  | -302.52   | -55.12    | 55.12              | -16.62                    | 16.62                          | 8.12                                                        |
| 2,2,3,4,4-pentamethylpentane | -247.2  | -302.52   | -55.32    | 55.32              | -26.52                    | 26.52                          | 9.52                                                        |

**Table S6.** Experimental and model values for ethylalkanes. All values in kJ/mol. Experimental data were taken from Rossini c.s., i.e. the first two entries from Prosen and Rossini [18] and all others from Labbauf et al. [19]. Upper table: mono up to tri-substituted alkanes. The red value 1.62 kJ/mol in the last row is the averaged absolute difference between the final model (for discussion see text) and the experimental values. Lower table: tetra-substituted alkanes.

| Ethyl and propyl alkanes             | Rossini | model dHf | model-exp | ABS<br>(model-exp)     | model-exp +<br>correction | model-exp + cor-<br>rection + corr.ethyl<br>/propyl | ABS(model-exp+<br>correction +<br>corr.ethyl)                                  |
|--------------------------------------|---------|-----------|-----------|------------------------|---------------------------|-----------------------------------------------------|--------------------------------------------------------------------------------|
| 3-ethylpentane                       | -189.80 | -192.97   | -3.17     | 3.17                   | -3.17                     | 2.83                                                | 2.83                                                                           |
| 3-ethylhexane                        | -211    | -213.6    | -2.6      | 2.6                    | -2.60                     | 3.40                                                | 3.4                                                                            |
| 3-ethylheptane                       | -230.6  | -234.23   | -3.63     | 3.63                   | -3.63                     | 2.37                                                | 2.37                                                                           |
| 4-ethylheptane                       | -230.6  | -234.23   | -3.63     | 3.63                   | -3.63                     | 2.37                                                | 2.37                                                                           |
| 3-ethyloctane                        | -251.3  | -254.86   | -3.56     | 3.56                   | -3.56                     | 2.44                                                | 2.44                                                                           |
| 4-ethyloctane                        | -251.3  | -254.86   | -3.56     | 3.56                   | -3.56                     | 2.44                                                | 2.44                                                                           |
| 3-methyl-3-ethylpentane              | -215.1  | -232.33   | -17.23    | 17.23                  | -6.23                     | -0.23                                               | 0.23                                                                           |
| 2-methyl-3-ethylpentane              | -211.36 | -218.7    | -7.34     | 7.34                   | -3.54                     | 0.36                                                | 0.36                                                                           |
| 2-methyl-3-ethylhexane               | -232.9  | -239.33   | -6.43     | 6.43                   | -2.63                     | 1.27                                                | 1.27                                                                           |
| 2-methyl-4-ethylhexane               | -237.8  | -239.33   | -1.53     | 1.53                   | -1.53                     | 2.37                                                | 2.37                                                                           |
| 3-methyl-3-ethylhexane               | -236.5  | -252.96   | -16.46    | 16.46                  | -5.46                     | 0.54                                                | 0.54                                                                           |
| 3-methyl-4-ethylhexane               | -230    | -239.33   | -9.33     | 9.33                   | -5.53                     | 0.47                                                | 0.47                                                                           |
| 2-methyl-3-ethylheptane              | -253.6  | -259.96   | -6.36     | 6.36                   | -4.66                     | 1.34                                                | 1.34                                                                           |
| 2-methyl-4-ethylheptane              | -258.4  | -259.96   | -1.56     | 1.56                   | -3.66                     | 2.34                                                | 2.34                                                                           |
| 2-methyl-5-ethylheptane              | -258.4  | -259.96   | -1.56     | 1.56                   | -3.66                     | 2.34                                                | 2.34                                                                           |
| 3-methyl-3-ethylheptane              | -257.1  | -273.59   | -16.49    | 16.49                  | -5.49                     | 0.51                                                | 0.51                                                                           |
| 3-methyl-4-ethylheptane              | -250.7  | -259.96   | -9.26     | 9.26                   | -5.46                     | 0.54                                                | 0.54                                                                           |
| 3-methyl-5-ethylheptane              | -255.6  | -259.96   | -4.36     | 4.36                   | -4.36                     | 1.64                                                | 1.64                                                                           |
| 4-methyl-4-ethylheptane              | -257.1  | -273.59   | -16.49    | 16.49                  | -5.49                     | 0.51                                                | 0.51                                                                           |
| 2,2-dimethyl-3-ethylpentane          | -238.5  | -258.06   | -19.56    | 19.56                  | -5.16                     | 0.84                                                | 0.84                                                                           |
| 2,3-dimethyl-3-ethylpentane          | -233.7  | -258.06   | -24.36    | 24.36                  | -7.86                     | -1.86                                               | 1.86                                                                           |
| 2,4-dimethyl-3-ethylpentane          | -235.2  | -244.43   | -9.23     | 9.23                   | -5.83                     | 0.17                                                | 0.17                                                                           |
| 3,3-diethylpentane                   | -232.1  | -252.96   | -20.86    | 20.86                  | -9.86                     | 2.14                                                | 2.14                                                                           |
| 3,3-diethylhexane                    | -251.85 | -273.59   | -21.74    | 21.74                  | -10.74                    | 1.26                                                | 1.26                                                                           |
| 3,4-diethylhexane                    | -247.8  | -259.96   | -12.16    | 12.16                  | -8.36                     | 3.64                                                | 3.64                                                                           |
| 4-n-propylheptane                    | -251.3  | -254.86   | -3.56     | 3.56                   | -3.56                     | 2.44                                                | 2.44                                                                           |
| 4-isopropylheptane                   | -253.6  | -259.96   | -6.36     | 6.36                   | -6.36                     | -0.36                                               | 0.36                                                                           |
| 2-methyl-3-isopropylhexane           | -255.9  | -265.06   | -9.16     | 9.16                   | -7.46                     | -1.46                                               | 1.46                                                                           |
| 2,3-dimethyl-3-isopropylpen-<br>tane | -258.2  | -283.79   | -25.59    | 25.59                  | -9.09                     | -3.09                                               | 3.09                                                                           |
| 2-methyl-3,3-diethylpentane          | -249.1  | -278.69   | -29.59    | 29.59                  | -13.09                    | -1.09                                               | 1.09                                                                           |
| averaged absolute difference         |         |           |           | 10.56                  |                           |                                                     | 1.62                                                                           |
|                                      | Rossini | model dHf | model-exp | ABS(model-exp<br>-exp) | model-exp +<br>correction | model-exp + cor-<br>rection + corr.ethyl<br>/propyl | ABS(model-exp+<br>correction +<br>corr.ethyl + Me-<br>Me-1,5-interac-<br>tion) |
| 2,2,3-trimethyl-3-ethylpentane       | -252.8  | -297.42   | -44.62    | 44.62                  | -9.46                     | -3.46                                               | 3.46                                                                           |
| 2,2,4-trimethyl-3-ethylpentane       | -253.5  | -283.79   | -30.29    | 30.29                  | -10.39                    | -4.39                                               | 4.11                                                                           |
| 2,3,4-trimethyl-3-ethylpentane       | -251.6  | -283.79   | -32.19    | 32.19                  | -10.19                    | -4.19                                               | 4.31                                                                           |
| 3,3,4,4-tetraethylhexane             | -264.3  | -379.94   | -115.64   | 115.64                 | -78.44                    | -54.44                                              | 54.44                                                                          |

**Table S7.** Experimental and model values for various alcohols. All values in kJ/mol. Experimental data were taken from Verevkin [21]. The red values are averaged absolute differences between the final model (for discussion see text) and the experimental values.

| Alcohols                                                 | Verevkin<br>[2005] | model dHf | model-exp | ABS (model-exp) |       |
|----------------------------------------------------------|--------------------|-----------|-----------|-----------------|-------|
| ethanol                                                  | -234               | -233.99   | 0.01      | 0.01            |       |
| 1-propanol                                               | -256               | -254.62   | 1.38      | 1.38            |       |
| 1-butanol                                                | -274.9             | -275.25   | -0.35     | 0.35            |       |
| 2-butanol                                                | -293.01            | -292.85   | 0.16      | 0.16            |       |
| 1-pentanol                                               | -294.7             | -295.88   | -1.18     | 1.18            |       |
| 2-pentanol                                               | -311               | -313.48   | -2.48     | 2.48            |       |
| 3-pentanol                                               | -316               | -313.48   | 2.52      | 2.52            |       |
| 1-hexanol                                                | -315.8             | -316.51   | -0.71     | 0.71            |       |
| 2-hexanol                                                | -335               | -334.11   | 0.89      | 0.89            |       |
| 3-hexanol                                                | -331.7             | -334.11   | -2.41     | 2.41            |       |
| 1-heptanol                                               | -336.5             | -337.14   | -0.64     | 0.64            |       |
| 2-heptanol                                               | -354.8             | -354.74   | 0.06      | 0.06            |       |
| 3-heptanol                                               | -357.8             | -354.74   | 3.06      | 3.06            |       |
| 4-heptanol                                               | -353.9             | -354.74   | -0.84     | 0.84            |       |
| 1-octanol                                                | -356.5             | -357.77   | -1.27     | 1.27            |       |
| 2-octanol                                                | -373.6             | -375.37   | -1.77     | 1.77            |       |
| 3-octanol                                                | -375.4             | -375.37   | 0.03      | 0.03            |       |
| 4-octanol                                                | -368.8             | -375.37   | -6.57     | 6.57            |       |
| 1-nonanol                                                | -378.9             | -378.4    | 0.50      | 0.5             |       |
| 1-decanol                                                | -397.2             | -399.03   | -1.83     | 1.83            |       |
| 1-undecanol                                              | -420.2             | -419.66   | 0.54      | 0.54            |       |
| 1-dodecanol                                              | -438.5             | -440.29   | -1.79     | 1.79            |       |
| 1-tetradecanol                                           | -482.7             | -481.55   | 1.15      | 1.15            |       |
| averaged absolute difference                             |                    |           |           | 1.40            |       |
| 2-methyl-1-butanol                                       | -302.5             | -300.98   | 1.52      | 1.52            |       |
| 3-methyl-1-butanol                                       | -301.6             | -300.98   | 0.62      | 0.62            |       |
| 2-methyl-2-butanol                                       | -331.8             | -332.21   | -0.41     | 0.41            |       |
| 3-methyl-2-butanol                                       | -318.3             | -318.58   | -0.28     | 0.28            |       |
| 2,3-dimethyl-2-butanol                                   | -357               | -357.94   | -0.94     | 0.94            |       |
| 2-methyl-2-pentanol                                      | -353.8             | -352.84   | 0.96      | 0.96            |       |
| 4-methyl-2-pentanol                                      | -337.4             | -339.21   | -1.81     | 1.81            |       |
| 2-methyl-3-pentanol                                      | -340.4             | -339.21   | 1.19      | 1.19            |       |
| 3-methyl-3-pentanol                                      | -350.6             | -352.84   | -2.24     | 2.24            |       |
| 2-methyl-2-hexanol                                       | -376.6             | -373.47   | 3.13      | 3.13            |       |
| 2-ethyl-1-hexanol                                        | -364.8             | -362.87   | 1.93      | 1.93            |       |
| averaged absolute difference                             |                    |           |           | 1.37            |       |
| ABS (model-exp + correction<br>+ Me-Me-1,5-interaction ) |                    |           |           |                 |       |
| 3,5,5-trimethyl-1-hexanol                                | -389               | -399.53   | -10.53    | 10.53           | 2.03  |
| 2,2,4,4-tetramethyl-3-pentanol                           | -397               | -443.66   | -17.86    | 17.86           | 0.86  |
| 2,2,4,4-tetramethyl-3-iPr-3-pentanol                     | -418.1             | -529.38   | -50.28    | 50.28           | 33.28 |
